# Supplementary material for: Nuclear Beclin 1 Destabilizes Retinoblastoma Protein to Promote Cell Cycle Progression and Colorectal Cancer Growth
Source: MDPI journal article supplement (doi:10.3390/cancers14194735), 2022-09-28
Supplement: s1 [file s1]

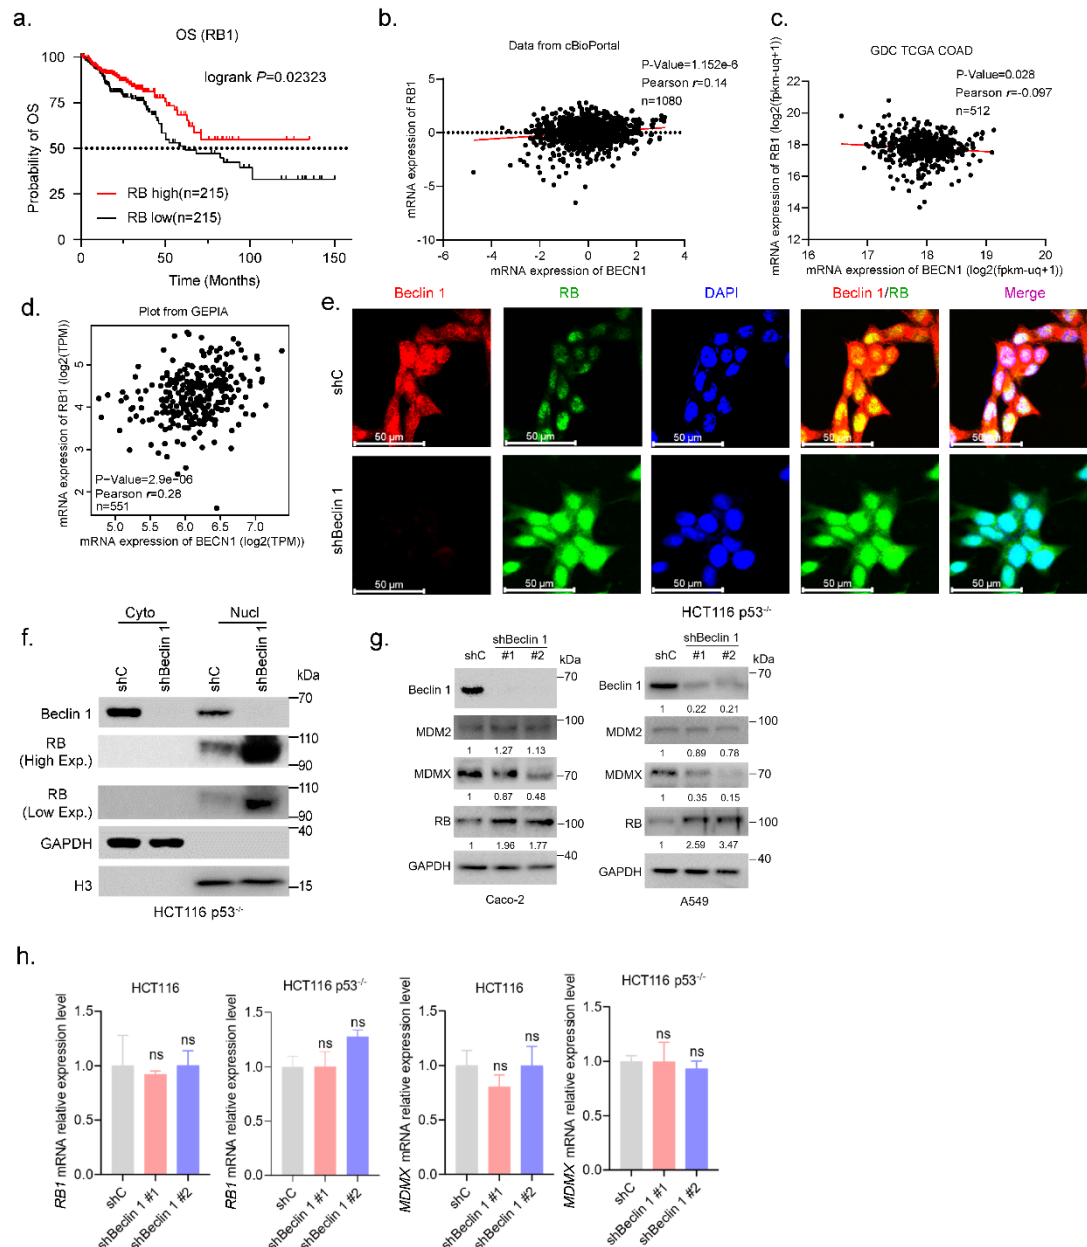

**Supplementary Figure S1. Beclin 1 is co-localized with RB in nuclei. Knockdown of *BECN1* has no significant effect on the steady-state *RB1* mRNA levels.**

**a. Low *RB1* expression is associated with poor overall survival of human colorectal cancer patients.** Kaplan-Meier plots of overall survival (OS) of human colorectal cancer patients were stratified by the *RB1* mRNA expression levels obtained from the TCGA COADREAD dataset (access on 3 May 2022).

**b-d. There was no significant correlation between *BECN1* and *RB1* mRNA levels in colon cancer patient samples.** Pearson correlation analyses were conducted between *BECN1* and *RB1* mRNA levels in colon cancer patient samples. **(b)** The mRNA expression datasets include TCGA Firehose Legace (access on 10 September 2022), TCGA PanCancer Atlas and CPTAC-2 Prospective from cBioPortal (access on 10 September 2022). The gene expression data were transformed to z-scores relative to all samples based on log2(RSEM) values in each dataset. **(c)** Data from GDC TCGA COAD. The gene expression data were expressed as log2(fpkm-ug+1) (access on 10 September 2022). **(d)** Data from GEPIA. (access on 10 September 2022) The gene expression data were expressed as log2(TPM). Transcripts Per Million, TPM; Fragments Per Kilobase of exon Per million read, FPKM; RNA-Seq by Expectation-Maximization, RSEM.

**e-f. Knockdown of *BECN1* upregulates RB protein expression in nuclei.**

- (e) HCT116 p53<sup>-/-</sup> cells stably expressing shC or shBeclin 1 were subjected to immunofluorescent (IF) staining for endogenous Beclin 1 (red) or RB (green) and counter-staining nuclei with DAPI (blue). Scale bar=50 µm. (f) Total cell lysates derived from HCT116 p53<sup>-/-</sup> cells stably expressing shC or shBeclin 1 were subjected to a nuclear-cytoplasmic fractionation assay.
- g. Caco-2 and A549 cells stably expressing shC or shBeclin 1 were subjected to western blot.
- h. HCT116 or HCT116 p53<sup>-/-</sup> cells stably expressing shC or shBeclin 1 (#1 or #2) were subjected to qPCR analyses for *RB1* or *MDMX* mRNA levels, *GAPDH* was used as an internal control. Three independent experiments were performed in triplicates. ns: not significant.

**Supplement Table S1.**

**qPCR primers**

| Gene name             | Primer sequences                                             |
|-----------------------|--------------------------------------------------------------|
| Human<br><i>BECN1</i> | F-AGGTTGAGAAAGGCGAGACA<br>R-GCTTTTGTCCACTGCTCCTC             |
| Human<br><i>GAPDH</i> | F-CCCGTGGAATGGAATGAGATT<br>R-CTCAGGAGAGGAGCCATTT             |
| Human<br><i>MDMX</i>  | F-GCAAGAAATTTAACTCTCCAAGCAA<br>R-CTTTGAACAATCTGAATACCAATCCTT |
| Human<br><i>MDM2</i>  | F-TTGCGGTGCCAAGCTTCTCT<br>R-TACCTGAGTCCGATGATTCC             |
| Human<br><i>RB1</i>   | F-GACCCAGAAGCCATTGAAATCT<br>R-GGTGTGCTGGAAAAGGGTCC           |

**Short-hairpin RNA oligo sequences.**

| Name                | Oligo sequences        |
|---------------------|------------------------|
| pLKO.1-shGFP        | TCCTAAGGTTAAGTCGCCCTCG |
| pLKO.1-shBeclin 1#1 | CCCGTGGAATGGAATGAGATT  |
| pLKO.1-shBeclin 1#2 | CTCAGGAGAGGAGCCATTT    |
| pLKO.1-shRB#1       | TTTGGACTAGAAATAATGTGG  |
| pLKO.1-shRB#2       | ATCGCTGTGATCCAATTTTCG  |

**Small interfering RNA oligo sequences.**

| Name                      | Sense chain (5'-3')   |
|---------------------------|-----------------------|
| hMDM2                     | GCCTGGCTCTGTGTGTAAT   |
| hMDMX                     | CACCTAGAAGTAATGGCTCAA |
| shScramble (target hMDMX) | ATAACTAGGAGGCAACACTCT |
| shScramble (target hMDM2) | ATGCTCGGTCCATGTGTTG   |
